# Supplementary material for: Food microstructure and protein digestion in the human gastrointestinal tract: an ileostomy study focusing on interindividual variability in gluten digestibility
Source: Royal Society of Chemistry journal article supplement (doi:10.1039/d4fo04508d), 2025-01-01
Supplement: d4fo04508d1.pdf [file d4fo04508d1.pdf]

Supplementary Table 1: Study meals' composition, energy and nutrient content

| Meal                                 | Dinner<br>(consisted of one of the options below)                                                                                                                                                                                                                                                    |                                                                                                                                                                                                                                                                                                                                                                                                                                                                       | Test meal<br>(Oat porridge and weetabix)                             |                                                                                                                     | Light lunch<br>(consisted of one of the three soup options and one of the two jelly options)                                                                                                                                                                                                                     |                                                                                                                                                                                                                                                          |                                                                                                                                                                                                                              |                                                                                                                                                                                                                 |                                                                                                                                                                                                    |
|--------------------------------------|------------------------------------------------------------------------------------------------------------------------------------------------------------------------------------------------------------------------------------------------------------------------------------------------------|-----------------------------------------------------------------------------------------------------------------------------------------------------------------------------------------------------------------------------------------------------------------------------------------------------------------------------------------------------------------------------------------------------------------------------------------------------------------------|----------------------------------------------------------------------|---------------------------------------------------------------------------------------------------------------------|------------------------------------------------------------------------------------------------------------------------------------------------------------------------------------------------------------------------------------------------------------------------------------------------------------------|----------------------------------------------------------------------------------------------------------------------------------------------------------------------------------------------------------------------------------------------------------|------------------------------------------------------------------------------------------------------------------------------------------------------------------------------------------------------------------------------|-----------------------------------------------------------------------------------------------------------------------------------------------------------------------------------------------------------------|----------------------------------------------------------------------------------------------------------------------------------------------------------------------------------------------------|
| Commercial name                      | <u>Superior fish pie</u>                                                                                                                                                                                                                                                                             | <u>Chicken and herb pie</u>                                                                                                                                                                                                                                                                                                                                                                                                                                           | <u>Flahavan's Organic Oats Pot - Original</u>                        | <u>Weetabix</u>                                                                                                     | <u>Vegetable soup</u>                                                                                                                                                                                                                                                                                            | <u>Tomato &amp; Basil</u>                                                                                                                                                                                                                                | <u>Honey carrot coriander</u>                                                                                                                                                                                                | <u>Chivers Strawberry jelly pot</u>                                                                                                                                                                             | <u>Chivers Raspberry jelly pot</u>                                                                                                                                                                 |
| Ingredients                          | Potato (38%), Milk, Pollock (Fish) (12%), Smoked Salmon (7.5%) (Smoked Salmon (Fish), Salt, Brown Sugar), Smoked Haddock (6%) (Haddock (Fish), Salt), Onion, Double Cream (Milk), Butter (Milk), Single Cream (Milk), Water, Cornflour, Lemon Concentrate, Chives, Salt, White Pepper, Dill, Parsley | Potato (34%), Chicken Breast Pieces (24%) (Chicken, Water, Cornflour), Water, Double Cream (Milk), Onion, Butter (Milk), Mushroom (3.1%), Single Cream (Milk), Cornflour, Chicken Stock (Chicken, Yeast Extract, Salt, Chicken Fat, Water, Lemon Juice Concentrate, Muscovado Sugar, Onion Powder, Leek Powder, Natural Black Pepper Flavours, Sage Oil), Salt, Lemon Juice, Parsley (0.18%), Chives (0.14%), Garlic Puree, White Pepper, Black Pepper, Thyme (0.02%) | Organic Wholegrain Rolled Oats (92%)<br>Organic Skimmed Milk Powder. | Wholegrain Wheat (95%), Malted Barley Extract, Sugar, Salt, Niacin, Iron, Thiamin (B1), Riboflavin (B2), Folic Acid | Water, Carrot (21%), Potato (11%), Onion (8%), Leek (5%), Cream (Milk), Salted Butter (Milk), Celery (2.5%), Concentrated Crushed Tomato, Vegetable Stock [Salt Yeast Extract, Rice Flour, Vegetables (Onion, Celery Carrot), Sunflower Oil, Turmeric, Parsley], Sugar, Fresh Parsley, Salt, Black Pepper, Thyme | Water, Concentrated Crushed Tomato (22%), Onion, Cream (Milk) (8%), Salted Butter (Milk), Sugar, Vegetable Stock [Salt, Yeast Extract, Rice Flour, Vegetables (Onion, Celery Carrot), Sunflower Oil, Turmeric, Parsley], Salt, Fresh Basil, Black Pepper | Carrot (42%), Water, Onion, Salted Butter (Milk), Honey (1.5%), Vegetable Stock [Salt, Yeast Extract, Rice Flour, Vegetables (Onion, Celery, Carrot), Sunflower Oil, Turmeric, Parsley], Salt, Fresh Coriander, Black Pepper | Water, Gelling Agents (Locust Bean Gum, Xanthan Gum, Gellan Gum), Acid (Citric Acid), Colours (Carmines, Anthocyanins), Flavours, Sweeteners (Aspartame, Acesulphame K), Acidity Regulator (Potassium Citrates) | Water, Gelling Agents (Locust Bean Gum, Xanthan Gum, Gellan Gum), Acid (Citric Acid), Colour (Carmines), Flavouring, Sweeteners (Aspartame, Acesulphame K), Acidity Regulator (Potassium Citrates) |
| Manufacturer                         | Cully & Sully<br>Cork, Ireland                                                                                                                                                                                                                                                                       | Cully & Sully<br>Cork, Ireland                                                                                                                                                                                                                                                                                                                                                                                                                                        | E. Flahavan & Sons Limited<br>Waterford, Ireland                     | Weetabix Limited<br>Iorhamptonshire, U                                                                              | Cully & Sully<br>Cork, Ireland                                                                                                                                                                                                                                                                                   | Cully & Sully<br>Cork, Ireland                                                                                                                                                                                                                           | Cully & Sully<br>Cork, Ireland                                                                                                                                                                                               | Chivers<br>Meath, Ireland                                                                                                                                                                                       | Chivers<br>Meath, Ireland                                                                                                                                                                          |
| Energy and nutrient content per 100g |                                                                                                                                                                                                                                                                                                      |                                                                                                                                                                                                                                                                                                                                                                                                                                                                       |                                                                      |                                                                                                                     |                                                                                                                                                                                                                                                                                                                  |                                                                                                                                                                                                                                                          |                                                                                                                                                                                                                              |                                                                                                                                                                                                                 |                                                                                                                                                                                                    |
| Energy (KJ)                          | 514                                                                                                                                                                                                                                                                                                  | 498                                                                                                                                                                                                                                                                                                                                                                                                                                                                   | 1603                                                                 | 1531                                                                                                                | 291                                                                                                                                                                                                                                                                                                              | 335                                                                                                                                                                                                                                                      | 181                                                                                                                                                                                                                          | 25                                                                                                                                                                                                              | 25                                                                                                                                                                                                 |
| (Kcal)                               | 123                                                                                                                                                                                                                                                                                                  | 119                                                                                                                                                                                                                                                                                                                                                                                                                                                                   | 383                                                                  | 362                                                                                                                 | 70                                                                                                                                                                                                                                                                                                               | 81                                                                                                                                                                                                                                                       | 43                                                                                                                                                                                                                           | 6                                                                                                                                                                                                               | 6                                                                                                                                                                                                  |
| Fat (g)                              | 6.1                                                                                                                                                                                                                                                                                                  | 6.3                                                                                                                                                                                                                                                                                                                                                                                                                                                                   | 5.0                                                                  | 2.0g                                                                                                                | 4.9                                                                                                                                                                                                                                                                                                              | 6.3                                                                                                                                                                                                                                                      | 1.8                                                                                                                                                                                                                          | 0.0                                                                                                                                                                                                             | 0.0                                                                                                                                                                                                |
| (of which saturates) (g)             | 3.9                                                                                                                                                                                                                                                                                                  | 4.2                                                                                                                                                                                                                                                                                                                                                                                                                                                                   | 1.0                                                                  | 0.6g                                                                                                                | 3.0                                                                                                                                                                                                                                                                                                              | 3.9                                                                                                                                                                                                                                                      | 1.0                                                                                                                                                                                                                          | 0.0                                                                                                                                                                                                             | 0.0                                                                                                                                                                                                |
| Carbohydrate (g)                     | 5.5                                                                                                                                                                                                                                                                                                  | 4.4                                                                                                                                                                                                                                                                                                                                                                                                                                                                   | 72.5                                                                 | 69g                                                                                                                 | 5.1                                                                                                                                                                                                                                                                                                              | 4.5                                                                                                                                                                                                                                                      | 5.4                                                                                                                                                                                                                          | 0.8                                                                                                                                                                                                             | 0.8                                                                                                                                                                                                |
| (of which sugars) (g)                | 0.7                                                                                                                                                                                                                                                                                                  | 1.1                                                                                                                                                                                                                                                                                                                                                                                                                                                                   | 5.3                                                                  | 4.2g                                                                                                                | 2.9                                                                                                                                                                                                                                                                                                              | 3.9                                                                                                                                                                                                                                                      | 5.0                                                                                                                                                                                                                          | 0.0                                                                                                                                                                                                             | 0.0                                                                                                                                                                                                |
| Fibre (g)                            | 1.4                                                                                                                                                                                                                                                                                                  | 0.8                                                                                                                                                                                                                                                                                                                                                                                                                                                                   | 5.5                                                                  | 10g                                                                                                                 | 1.4                                                                                                                                                                                                                                                                                                              | 1.0                                                                                                                                                                                                                                                      | 2.0                                                                                                                                                                                                                          | 0.0                                                                                                                                                                                                             | 0.0                                                                                                                                                                                                |
| Protein (g)                          | 10.9                                                                                                                                                                                                                                                                                                 | 10.8                                                                                                                                                                                                                                                                                                                                                                                                                                                                  | 13.0                                                                 | 12g                                                                                                                 | 0.7                                                                                                                                                                                                                                                                                                              | 1.0                                                                                                                                                                                                                                                      | 0.4                                                                                                                                                                                                                          | 0.1                                                                                                                                                                                                             | 0.1                                                                                                                                                                                                |
| Salt (g)                             | 0.5                                                                                                                                                                                                                                                                                                  | 0.6                                                                                                                                                                                                                                                                                                                                                                                                                                                                   | 0.1                                                                  | 0.28g                                                                                                               | 0.6                                                                                                                                                                                                                                                                                                              | 0.6                                                                                                                                                                                                                                                      | 0.5                                                                                                                                                                                                                          | 0.0                                                                                                                                                                                                             | 0.0                                                                                                                                                                                                |
| Servings in the study meals          | 400g                                                                                                                                                                                                                                                                                                 | 400g                                                                                                                                                                                                                                                                                                                                                                                                                                                                  | 80g                                                                  | 1 biscuit (18-19g)                                                                                                  | 400g                                                                                                                                                                                                                                                                                                             | 400g                                                                                                                                                                                                                                                     | 400g                                                                                                                                                                                                                         | 150g                                                                                                                                                                                                            | 150g                                                                                                                                                                                               |
